1 **Mutational analysis of field cancerization in bladder cancer**

2

3 Trine Strandgaard<sup>1,2</sup>, Iver Nordentoft<sup>1</sup>, Philippe Lamy<sup>1</sup>, Emil Christensen<sup>1,2</sup>, Mathilde  
4 Borg Houlberg Thomsen<sup>1</sup>, Jørgen Bjerggaard Jensen<sup>2,3</sup>, and Lars Dyrskjøt<sup>1,2\*</sup>

5

6 <sup>1</sup>Department of Molecular Medicine, Aarhus University Hospital, 8200 Aarhus N,  
7 Denmark

8 <sup>2</sup>Department of Clinical Medicine, Health, Aarhus University, 8000 Aarhus C, Denmark

9 <sup>3</sup>Department of Urology, Aarhus University Hospital, 8200 Aarhus N, Denmark

10

11 **\*Corresponding author:** Correspondence and requests for materials should be  
12 addressed Lars Dyrskjøt, PhD, Department of Molecular Medicine, Aarhus University  
13 Hospital, Denmark. Email: lars@clin.au.dk.

14 The multifocal and recurrent nature of bladder cancer has been explained by field  
15 cancerization of the bladder urothelium. To shed light on field cancerization in the  
16 bladder, we investigated the mutational landscape of normal appearing urothelium and  
17 paired bladder tumors from four patients. Sequencing of 509 cancer driver genes  
18 revealed the presence of 2-16 mutations exclusively localized in normal tissue  
19 (average target read depth 634x). Furthermore, 6-13 mutations were shared between  
20 tumor and normal samples and 8-75 mutations were exclusively detected in tumor  
21 samples. More mutations were observed in normal samples from patients with  
22 multifocal disease compared to patients with unifocal disease. Mutations in normal  
23 samples had low allele frequencies compared to tumor mutations ( $p < 2.2 \times 10^{-16}$ ).  
24 Furthermore, significant differences in the type of nucleotide changes between tumor,  
25 normal and shared mutations ( $p = 2.7 \times 10^{-8}$ ) were observed, and mutations in APOBEC  
26 context were observed primarily among tumor mutations ( $p = 0.026$ ). No differences in  
27 functional impact between normal, shared and tumor mutations were observed  
28 ( $p = 0.23$ ). Overall, these findings support the theory of multiple fields in the bladder,  
29 and document non-tumor specific driver mutations to be present in normal appearing  
30 bladder tissue.

## 31 **Introduction**

32 By applying whole exome sequencing and deep targeted sequencing on bladder  
33 tumors, it was recently shown that tumors developed years apart in the same patients  
34 share multiple mutations and hence are clonally related<sup>1-3</sup>. Furthermore, apparently  
35 normal urothelium has been documented to contain mutations with low allele  
36 frequencies (~3%) that are typically observed at high frequencies in tumors (clonal  
37 mutations)<sup>1-3</sup>. Multiple studies have investigated genomic alterations in normal  
38 appearing bladder tissue from cystectomy specimens, however using technologies  
39 that do not allow detection of low-frequency mutations. The genomic alterations  
40 observed in these studies include copy number alterations of chromosome 5, 9, 13,  
41 16, and 17 as well as mutations or loss of *RB1* and *TP53*<sup>4-9</sup>. These findings  
42 corroborates the suggestions of the presence of field cancerization in the bladder.  
43 Similar results have been reported in other tissue types, where studies have revealed  
44 the presence of mutations in well-characterized cancer driver genes in apparently  
45 healthy tissue and pre-cancer lesions<sup>10-13</sup>.

46

47 Bladder cancer (BC) is multifocal in almost half of the cases with primary tumour and  
48 in more than 50% of the patients with recurrent non-muscle invasive BC (NMIBC)<sup>14</sup>.  
49 Moreover, recurrent BC is common as the majority of the patients with non-muscle  
50 invasive BC (NMIBC) relapse within five years<sup>15,16</sup>. Approximately 75% of patients with  
51 BC present with NMIBC, and 5-25% of these will progress to muscle-invasive bladder  
52 cancer (MIBC)<sup>16,17</sup>. Multifocality and the frequent recurrences of BC are hypothesized  
53 to originate from field cancerization of the bladder urothelium<sup>18</sup>. This concept was first  
54 described in oral squamous epithelium in 1953 by Slaughter et al. as an explanation  
55 of the high local recurrence rate of oral cancers<sup>19</sup>. More recent, field cancerization has  
56 been described as an underlying mechanism for tumor development in various cancer  
57 types, including BC<sup>20</sup>.

58

59 Field cancerization is understood as one or more areas, or fields, with mutated cells.  
60 Normal cell lineages acquire mutations that are positively selected for in the  
61 microenvironment of an otherwise healthy organ. Consequently, the mutant clone can  
62 grow to produce fields of a monoclonal origin that predispose to malignant growth  
63 within these transformed areas. The transformed cells may appear normal or  
64 dysplastic<sup>20,21</sup>. Thomsen et al proposed a theory of multiple fields being present in the

65 bladder<sup>2</sup> where parallel expansion of different mutated stem cells might lead to multiple  
66 transformed fields intermixed in the bladder urothelium. Tumors will mirror the genetic  
67 alterations from the field from which it arose. This theory may explain the low  
68 frequencies of mutations observed in normal samples<sup>2</sup>.

69

70 In our previous study of bladder cancer field cancerization we analyzed mutations in  
71 adjacent normal tissue restricted to mutations observed in the tumor samples, and  
72 consequently, non-tumor specific mutations were not investigated<sup>2</sup>. In this study, we  
73 characterized mutations in normal appearing urothelium adjacent to tumors by deep  
74 targeted sequencing. We detected high-impact mutations in known driver genes that  
75 were not observed in the tumor. Furthermore, we observed mutations shared between  
76 tumor and normal samples (tumor field effect) as well as mutations specific to the  
77 tumors (mutations acquired later in development).

78

## 79 **Results**

80 We performed deep-targeted sequencing of DNA obtained from four patients (patients  
81 1 to 4) with advanced bladder cancer, treated with radical cystectomy (see  
82 Supplementary Fig. S2 and Supplementary Table S3 for detailed disease courses).  
83 From each patient, DNA was procured from bulk tumor biopsies (n=2-7) and laser  
84 microdissected (LMD) biopsies of normal appearing urothelium (n=6-11) (See  
85 Supplementary Table S1 for overview of samples and sequencing information).  
86 Individual bulk tumor samples were previously analyzed by whole exome sequencing  
87 (WES) followed by deep targeted amplicon sequencing of LMD tumor and normal  
88 samples guided by the original WES of bulk tumor<sup>2</sup>. In this present study, we expand  
89 on our previous study to include the analysis of mutations uniquely present in normal  
90 appearing adjacent tissue by deep targeted sequencing (Figure 1a).

91

92 **Deep targeted sequencing.** Extracted DNA from tumors and LMD normal samples  
93 was pooled resulting in one pool of tumor DNA (tumor pool) and one pool of normal  
94 DNA (normal pool) from each of the four patients. We performed deep targeted  
95 amplicon sequencing of 509 cancer genes on both pools and on matched leukocyte  
96 DNA as reference. We obtained an average target read depth of 634x (range: 360-  
97 1073). Following sequence read consolidation (UID error correction)<sup>22</sup> the average  
98 target read depth was 69x (range: 36-129). In total, after filtering, we identified 30-93

99 mutations in the samples from the four patients. Of these, 2-16 were unique for pools  
100 of normal samples (N-Mutations), 8-75 were unique for tumor pools (T-Mutations), and  
101 6-13 were shared between tumor pools and normal pools (S-Mutations)(Figure 1b).

102

103 **Analysis of field cancerization.** Patients 1 and 2 presented with multifocal disease,  
104 whereas patients 3 and 4 had unifocal disease. In patients 1 and 2, 39% (25/64) of the  
105 mutations were N-Mutations, and 34% (22/64) were S-Mutations. Mutations called in  
106 patients 3 and 4 were mainly T-Mutations, with only 5% (7/143) being N-Mutations and  
107 13% (19/143) S-Mutations - indicating that uni- and multifocal patients may show  
108 different levels of field cancerization. Mutations in known BC driver genes were  
109 detected in both N-, S- and T-Mutation groups, most of them being among T-  
110 Mutations. However, in patient 1, two N-mutations were observed in bladder cancer  
111 driver genes. Damaging mutations were present in all N-, S- and T-Mutation groups.  
112 We detected the introduction of premature stop codons, mainly in the T-Mutation  
113 group. However, for patient 1 premature stop codons were solely observed within the  
114 N- and S-Mutations. Mutation allele frequencies (AFs) varied for the different  
115 mutations detected but were generally low for N-Mutations and high for T-Mutations.  
116 See Figure 1b and **Table 1** for details.

117

118 Interestingly, we observed N-Mutations in genes known to have a role in cancer  
119 development. To corroborate our findings, we investigated the genes affected by non-  
120 synonymous mutations in 1889 patients with a total of 1934 samples from 11 different  
121 BC studies using cBioPortal. In total, 0.6% to 23% (mean 4%) of the bladder tumors  
122 harbored mutations in the same set of genes. The six most frequently non-  
123 synonymous mutated N-Mutation genes in the BC datasets were KMT2D (23%),  
124 SPTA1 (8%), TRRAP (7%), PRKDC (6%), POLE (4%), and KDM5A (4%).

125

126 **Validation of mutations by WES and ddPCR.** Validation of mutations was performed  
127 in a two-step process. Firstly, WES data of tumor samples was used to validate  
128 mutations detected by our deep targeted sequencing approach. In general, we  
129 observed consistency in AFs measured by the two platforms, and most positions were  
130 covered across all samples (Spearman correlation=0.77,  $p\text{-val}=2.2*10^{-16}$ ) (Figure 2a  
131 and 2b).

132

133 Secondly, we used ddPCR to validate the presence/absence of selected alterations in  
134 normal and tumor samples. Eight mutations previously observed in tumor and normal  
135 samples<sup>2</sup> and three additional N-Mutations were chosen for ddPCR validation. For  
136 every patient, tumor mutations were analyzed by ddPCR in 6-11 samples from the  
137 normal appearing urothelium. Except for a deletion in *RBM10*, the tumor alterations  
138 were detected at low frequencies in normal samples (Figure 2c). AFs from ddPCR  
139 were compared to deep targeted amplicon sequencing of the same samples and a  
140 correlation coefficient of 0.93 was observed. For N-Mutation analysis, DNA extracted  
141 from 4-7 tumor areas were analyzed and none of the mutations were detected in any  
142 of the tumor samples analyzed by ddPCR (Figure 2d), which validated the normal  
143 tissue specificity

144

145 **Analysis of mutational context.** We performed a combined analysis of the mutations  
146 detected in the four patients as the individual patients harbored too few mutations for  
147 robust statistical analyses. We observed a significant difference in the six single-base  
148 substitutions between the three groups of mutations ( $p=2.7*10^{-8}$ , Fisher's Exact Test):  
149 58% of T-Mutations were C>T changes compared to 40% of both N- and S-Mutations.  
150 Furthermore, we observed no T>G mutations in N-Mutations, whereas 40% of S-  
151 Mutations and 1.5% of T-Mutations were T>G base pair substitutions. C>G mutations  
152 were present among N-Mutations and T-Mutations at 25% and 22% frequency,  
153 respectively, compared to 3% in S-Mutations (Figure 3a). C>T mutations have been  
154 associated with various signatures, including the age-dependent signature 1 and the  
155 APOBEC-related signature 2. C>G substitutions have been attributed to signature 13  
156 (APOBEC related), which is commonly observed in BC<sup>13,23-25</sup>.

157 We observed no difference in the functional impact of the mutations observed in the  
158 three mutation categories. This was observed both when assessing mutations  
159 categorized as being of high, moderate, or low/modifier impact by the SNPEff software  
160 ( $p=0.23$ , Fisher's Exact Test), and when analyzing synonymous and non-synonymous  
161 mutations ( $p=0.77$ , Fisher's Exact Test) (Figure 3b and 3c).

162 Next, we assessed the proportion of APOBEC related mutagenesis. C>T/G mutations  
163 in a TCW context, where W is either T or A, were evaluated as representing the  
164 APOBEC signature<sup>26</sup>. We observed a significant difference between the proportion of  
165 N-, S-, and T-Mutations in APOBEC related context ( $p=0.0011$ , Fisher's Exact Test).  
166 In addition, we observed a significant difference when comparing C>T/C>G mutations

167 in an APOBEC-related context and C>T/C>G in non-APOBEC related context in N-,  
168 S-, and T-Mutations ( $p=0.026$ , Fisher's Exact Test) (Figure 3d).

169 Finally, AFs for mutations in normal samples were significantly lower than for  
170 mutations in tumor samples ( $p<2.2*10^{-16}$ , Unpaired T-test)(Figure 3d). There was no  
171 significant difference between AFs for T-Mutations and S-Mutations measured in the  
172 tumor pool ( $p=0.09$ , Unpaired T-test).

173

## 174 **Discussion**

175 Here we characterized the field cancerization in four patients with advanced BC and  
176 addressed the question of multiple mutated fields being present within the bladder.  
177 Field cancerization was observed in all four patients analyzed, being more pronounced  
178 in patients with multifocal disease compared to patients with unifocal disease. We  
179 found that the normal appearing urothelium harbored private mutations not detected  
180 in the tumor samples. We suggest that these mutations represent one or more fields  
181 that have not lead to tumor development. Additionally, we detected mutations that  
182 were shared between normal and tumor samples, representing mutations from the  
183 field developing into a tumor. Mutations unique for tumor samples were also present,  
184 indicating further genomic evolution of the tumor after initial development from the  
185 field.

186

187 Different origins of these mutated cells have been proposed<sup>21</sup>. These include  
188 intraepithelial migration and/or luminal seeding of carcinoma cells from existing tumors  
189 followed by implantation of the carcinoma cells – eventually giving rise to recurrent  
190 tumors. Another theory is that the field develops before the tumor from an altered stem  
191 cell embedded in the urothelium. Following this, the altered clone can expand, leading  
192 to a population of mutated daughter cells forming a cancerized field<sup>20,21</sup>.

193

194 Our analysis showed that mutations were present at low frequencies in the normal  
195 appearing samples. This could be explained by the seeding of tumor cells from existing  
196 tumors, resulting in the presence of a few mutated tumor cells in normal samples. Also,  
197 it could be due to some tumor cells migrating through the epithelial layer<sup>18</sup>. However,  
198 these explanations do not explain the presence of mutations unique for the normal  
199 samples. Therefore, another possible explanation for the presence of low frequency  
200 mutations in normal samples is that a few mutated cells are intermixed either with

201 normal cells or with other differently transformed cells. Different mutated cell lineages  
202 can arise if more self renewing cells (e.g. stem cells) are mutated in different ways and  
203 expand in parallel, creating multiple transformed fields<sup>2,27,28</sup>. This theory may explain  
204 the presence of normal specific mutations. If recurrent tumors develop from fields that  
205 arose from the same mutated stem cell, these will be clonally related<sup>2</sup>. This could  
206 hence explain the clonal origin of metachronous bladder tumors<sup>1</sup> as well as paired  
207 upper tract and bladder urothelial tumors<sup>29</sup>.

208

209 Two studies from Martincorena et al.<sup>11,13</sup> have revealed the presence of non-tumor  
210 specific mutations in normal tissue from esophagus and skin, respectively. These  
211 results indicate that the field arise prior to eventual tumor development and that normal  
212 cells harbor mutations without necessarily developing into a tumor. To our knowledge,  
213 no previously published studies have focused on mutations in normal appearing  
214 bladder tissue without being restricted to mutations observed in the tumor. Our study  
215 was performed on normal appearing bladder tissue for non-tumor guided detection of  
216 mutations. In order to detect these low-frequency mutations in normal samples, it is  
217 necessary to perform deep sequencing. Furthermore, to differentiate low frequency  
218 mutations from common sequencing errors, error correction methods, such as the  
219 inclusion of UIDs<sup>22</sup>, should be included in the sequencing and subsequent analyses.

220

221 We observed that the expected impact of N-, S- and T-Mutations was the same across  
222 all three groups. We would expect S-Mutations and T-Mutations to have a higher  
223 impact than N-Mutations, as these two groups drive initial tumor formation and later  
224 tumor evolution. In the Martincorena et al studies, high impact mutations, missense  
225 mutations, and cancer driver mutations were observed in normal tissue from non-  
226 cancerous individuals<sup>11,13</sup>. Consequently, these findings may imply that tumor  
227 formation is more dependent on the affected genes, combination of genes, and the  
228 order in which mutations occur<sup>30</sup>. Additionally, from our analysis it is not possible to  
229 know how many mutations are present in the individual cell, and future studies utilizing  
230 single cell sequencing are needed to delineate the genomic changes per cell.

231

232 In addition, we observed that mutations in APOBEC context were mainly present in  
233 the T-Mutation group. This is in concordance with other studies that have suggested  
234 that APOBEC mediated mutagenesis is a late event in tumor evolution<sup>31,32</sup>.



235 Furthermore, most of the non-APOBEC related C>T mutations observed in the normal  
236 samples were found in a CpG context (7/11) and may hence be related to the age  
237 related signature 1, in accordance with the fact that mutations accumulate in normal  
238 cells over time<sup>24</sup>.

239

240 We hypothesize that field cancerization may have prognostic and predictive value.  
241 However, as stated previously, results from our and other studies have shown that  
242 mutations do indeed occur in normal cells without leading to cancer development. This  
243 may affect screening initiatives for early detection of cancer using e.g. analysis of  
244 mutated DNA in urine and plasma. Detection of high impact mutations might not imply  
245 that patients have cancer. A recent study detected mutations in cfDNA from individuals  
246 without cancer, documenting the need for using tumor guided approaches<sup>33</sup>.

247

248 In conclusion, this study sheds light on the field cancerization in BC, and documents  
249 that non-tumor specific mutations are present in normal appearing tissue. It will be  
250 necessary to analyze tissue from additional patients to be able to better describe the  
251 field cancerization and its role in tumor development, disease recurrence and  
252 aggressiveness, and e.g. BCG treatment efficacy. Moreover, novel methods for single  
253 cell analysis may be powerful supplements to better understand the biology of field  
254 cancerization.

255

## 256 **Patients and methods**

257 **Clinical samples.** Patients included in the study were diagnosed with primary BC and  
258 underwent open radical cystectomy and extended lymph node dissection to the aortic  
259 bifurcation. The patients had not received neoadjuvant chemotherapy or radiation  
260 therapy before cystectomy. Tissue biopsies were embedded in TissueTek OCT™  
261 Compound (Sakura, Finetek, Vaerloese, Denmark), snap-frozen in liquid nitrogen and  
262 stored at -80 °C. Two to seven biopsies were obtained from tumors from each patient  
263 together with six to 12 biopsies taken throughout the normal appearing urothelium.  
264 Blood samples were stored in EDTA tubes at -80 °C. Areas of tumor and normal  
265 urothelium were LMD for all patients to ensure cell content specificity of the samples.  
266 LMD and DNA extraction from bulk and LMD samples and blood samples were  
267 performed as described previously<sup>2</sup>. Patients were treated at Aarhus University  
268 Hospital in 2014 and provided informed written consent. The study was approved by

269 The Danish National Committees on Health Research Ethics (#1300174). All methods  
270 in the study were carried out in accordance with the approved guidelines and  
271 regulations.

272

273 **Targeted sequencing and data processing.** Targeted sequencing was performed  
274 on pools of normal samples and pools of tumor samples using the NuGEN Ovation®  
275 Cancer Panel 2.0 Target Enrichment System (509 genes; NuGEN Technologies)<sup>34</sup>.  
276 DNA from normal samples and tumor samples from each patient was pooled prior to  
277 library generation in order to obtain enough input material. Tumor pools for all patients  
278 consisted of 1:1 amounts of bulk tumor DNA. Libraries were prepared from 500 ng  
279 DNA (Qubit), as previously described<sup>22</sup>. Libraries were amplified using 21 PCR cycles  
280 and subsequently pooled eight at a time and single-end sequenced (150 bp) on an  
281 Illumina NextSeq 500 (High output).

282 Sequencing data was aligned and mapped, as previously described<sup>22</sup>. In brief, reads  
283 with identical UIDs and mapping positions were collapsed to create high confidence  
284 consensus reads. If less than three reads shared UIDs and mapping positions, they  
285 were discarded. Mutations were called using MuTect2.  
286 Mutations identified in pools of normal samples and/or pools of tumor samples were  
287 assessed using bam-readcount in previously generated WES data. WES data was  
288 obtained from tumor and leukocyte samples from the same patients and processed as  
289 previously described<sup>1,2</sup>. Moreover, mutations identified in pools of normal samples  
290 were assessed in the associated pools of tumor samples and vice versa.

291

292 **Filtering of mutations.** Initially, mutations were categorized in three different sets  
293 based on whether they were called (MuTect2) or observed (pileup tools) only in normal  
294 samples (Normal specific mutations - N-Mutations), only in tumor samples (Tumor  
295 specific mutations or T-Mutations) or in both pools (Shared mutations or S-Mutations)  
296 using the cancer panel sequencing (Supplementary Fig. S1). To ensure normal  
297 sample specificity, initial N-Mutations were evaluated in previously generated WES  
298 data. Mutations were discarded if present with two or more alternate reads in any of  
299 the corresponding tumor samples.

300 Any positions with more than two alleles were excluded and all remaining mutations  
301 were reviewed manually using the Integrative Genomics Viewer (IGV)<sup>35</sup>.

302

303 **Functional assignment.** We identified mutations in known BC driver genes defined  
304 in IntOGen (BBGLab)<sup>36</sup> and assigned the functional impact to mutations using  
305 PolyPhen-2 and snpEff v4.3<sup>37,38</sup>.

306

307 **Digital Droplet PCR (ddPCR).** For the validation of N-Mutations, an oligo covering  
308 the whole mutated amplicon of interest (positive control) was designed due to  
309 insufficient sample amounts. ddPCR and data analysis were performed as previously  
310 described<sup>39</sup>. Assays targeting regions on chromosome 16 and 3 were used for  
311 quantification of total DNA copies as these regions are rarely subject to copy number  
312 alterations in BC<sup>37</sup>. Primer and probe sequences are listed in Supplementary Table  
313 S2.

314

315 **Statistical analysis.** The Shapiro-Wilk test or Quantile-Quantile plot (QQ-plot) was  
316 used to test for normality of the data. Statistical analyses were performed using  
317 unpaired t-test on log-transformed parametric data with Welch correction for data with  
318 significantly different standard deviations. For categorical variables, Fisher's Exact test  
319 was used. Correlation was calculated using Spearman. Statistical significance was set  
320 at  $p < 0.05$ . All statistical analyses were performed using R (R version 3.5.1).

321

## 322 **Data availability**

323 The raw sequencing datasets generated during the current study are not publicly  
324 available due to local Danish legislation on data sharing. However, processed  
325 datasets are available from the corresponding author on reasonable request.

326

## 327 **References**

- 328 1. Lamy, P. *et al.* Paired Exome Analysis Reveals Clonal Evolution and Potential  
329 Therapeutic Targets in Urothelial Carcinoma. *Cancer Res.* **76**, 5894–5906  
330 (2016).
- 331 2. Thomsen, M. B. H. *et al.* Comprehensive multiregional analysis of molecular  
332 heterogeneity in bladder cancer. *Sci. Rep.* **7**, 11702 (2017).
- 333 3. Nordentoft, I. *et al.* Mutational context and diverse clonal development in early  
334 and late bladder cancer. *Cell Rep.* **7**, 1649–1663 (2014).
- 335 4. Chaturvedi, V. *et al.* Superimposed histologic and genetic mapping of  
336 chromosome 17 alterations in human urinary bladder neoplasia. *Oncogene* **14**,  
337 2059–2070 (1997).
- 338 5. Czerniak, B. *et al.* Superimposed histologic and genetic mapping of

- 339 chromosome 9 in progression of human urinary bladder neoplasia: implications  
340 for a genetic model of multistep urothelial carcinogenesis and early detection of  
341 urinary bladder cancer. *Oncogene* **18**, 1185–1196 (1999).
- 342 6. Czerniak, B. *et al.* Genetic modeling of human urinary bladder carcinogenesis.  
343 *Genes Chromosomes Cancer* **27**, 392–402 (2000).
- 344 7. Kram, A. *et al.* Mapping and genome sequence analysis of chromosome 5  
345 regions involved in bladder cancer progression. *Lab. Invest.* **81**, 1039–1048  
346 (2001).
- 347 8. Majewski, T. *et al.* Understanding the development of human bladder cancer by  
348 using a whole-organ genomic mapping strategy. *Lab. Invest.* **88**, 694–721  
349 (2008).
- 350 9. Yoon, D. S. *et al.* Genetic mapping and DNA sequence-based analysis of  
351 deleted regions on chromosome 16 involved in progression of bladder cancer  
352 from occult preneoplastic conditions to invasive disease. *Oncogene* **20**, 5005–  
353 5014 (2001).
- 354 10. Weaver, J. M. J. *et al.* Ordering of mutations in preinvasive disease stages of  
355 esophageal carcinogenesis. *Nat. Genet.* **46**, 837–843 (2014).
- 356 11. Martincorena, I. *et al.* Tumor evolution. High burden and pervasive positive  
357 selection of somatic mutations in normal human skin. *Science* **348**, 880–886  
358 (2015).
- 359 12. Wood, H. M. *et al.* The clonal relationships between pre-cancer and cancer  
360 revealed by ultra-deep sequencing. *J. Pathol.* **237**, 296–306 (2015).
- 361 13. Martincorena, I. *et al.* Somatic mutant clones colonize the human esophagus  
362 with age. *Science* (2018). doi:10.1126/science.aau3879
- 363 14. Ströck, V. & Holmäng, S. A Prospective Study of the Size, Number and  
364 Histopathology of New and Recurrent Bladder Tumors. *Urology Practice* **2**, 260–  
365 264 (2015).
- 366 15. Sylvester, R. J. *et al.* Systematic Review and Individual Patient Data Meta-  
367 analysis of Randomized Trials Comparing a Single Immediate Instillation of  
368 Chemotherapy After Transurethral Resection with Transurethral Resection Alone  
369 in Patients with Stage pTa-pT1 Urothelial Carcinoma of the Bladder: Which  
370 Patients Benefit from the Instillation? *Eur. Urol.* **69**, 231–244 (2016).
- 371 16. Kamat, A. M., Bağcıoğlu, M. & Huri, E. What is new in non-muscle-invasive  
372 bladder cancer in 2016? *Turk J Urol* **43**, 9–13 (2017).
- 373 17. Babjuk, M. *et al.* EAU Guidelines on Non-Muscle-invasive Urothelial Carcinoma  
374 of the Bladder: Update 2016. *Eur. Urol.* **71**, 447–461 (2017).
- 375 18. Höglund, M. Bladder cancer, a two phased disease? *Semin. Cancer Biol.* **17**,  
376 225–232 (2007).
- 377 19. Slaughter, D. P., Southwick, H. W. & Smejkal, W. ‘Field cancerization’ in oral  
378 stratified squamous epithelium. Clinical implications of multicentric origin. *Cancer*  
379 **6**, 963–968 (1953).
- 380 20. Curtius, K., Wright, N. A. & Graham, T. A. An evolutionary perspective on field  
381 cancerization. *Nat. Rev. Cancer* **18**, 19–32 (2018).
- 382 21. Braakhuis, B. J. M., Tabor, M. P., Kummer, J. A., Leemans, C. R. & Brakenhoff,  
383 R. H. A genetic explanation of Slaughter’s concept of field cancerization:  
384 evidence and clinical implications. *Cancer Res.* **63**, 1727–1730 (2003).
- 385 22. Christensen, E. *et al.* Optimized targeted sequencing of cell-free plasma DNA  
386 from bladder cancer patients. *Sci. Rep.* **8**, 1917 (2018).
- 387 23. Alexandrov, L. B. *et al.* Clock-like mutational processes in human somatic cells.  
388 *Nat. Genet.* **47**, 1402–1407 (2015).

- 389 24. Alexandrov, L. B. *et al.* Signatures of mutational processes in human cancer.  
390 *Nature* **500**, 415–421 (2013).
- 391 25. Ju, Y. S. The mutational signatures and molecular alterations of bladder cancer.  
392 *Transl. Cancer Res.* **6**, S689–S701 (2017).
- 393 26. Roberts, S. A. *et al.* An APOBEC cytidine deaminase mutagenesis pattern is  
394 widespread in human cancers. *Nat. Genet.* **45**, 970–976 (2013).
- 395 27. Höglund, M. On the origin of syn- and metachronous urothelial carcinomas. *Eur.*  
396 *Urol.* **51**, 1185–93; discussion 1193 (2007).
- 397 28. Pardal, R., Clarke, M. F. & Morrison, S. J. Applying the principles of stem-cell  
398 biology to cancer. *Nat. Rev. Cancer* **3**, 895–902 (2003).
- 399 29. Audenet, F. *et al.* Clonal Relatedness and Mutational Differences between  
400 Upper Tract and Bladder Urothelial Carcinoma. *Clin. Cancer Res.* (2018).  
401 doi:10.1158/1078-0432.CCR-18-2039
- 402 30. Levine, A. J., Jenkins, N. A. & Copeland, N. G. The Roles of Initiating Truncal  
403 Mutations in Human Cancers: The Order of Mutations and Tumor Cell Type  
404 Matters. *Cancer Cell* **35**, 10–15 (2019).
- 405 31. Jamal-Hanjani, M. *et al.* Tracking the Evolution of Non-Small-Cell Lung Cancer.  
406 *N. Engl. J. Med.* **376**, 2109–2121 (2017).
- 407 32. Jolly, C. & Van Loo, P. Timing somatic events in the evolution of cancer.  
408 *Genome Biol.* **19**, 95 (2018).
- 409 33. Phallen, J. *et al.* Direct detection of early-stage cancers using circulating tumor  
410 DNA. *Sci. Transl. Med.* **9**, (2017).
- 411 34. Li, H. & Durbin, R. Fast and accurate short read alignment with Burrows-  
412 Wheeler transform. *Bioinformatics* **25**, 1754–1760 (2009).
- 413 35. Robinson, J. T., Thorvaldsdóttir, H., Wenger, A. M., Zehir, A. & Mesirov, J. P.  
414 Variant Review with the Integrative Genomics Viewer. *Cancer Res.* **77**, e31–e34  
415 (2017).
- 416 36. Gonzalez-Perez, A. *et al.* IntOGen-mutations identifies cancer drivers across  
417 tumor types. *Nat. Methods* **10**, 1081–1082 (2013).
- 418 37. Schepeler, T. *et al.* A high resolution genomic portrait of bladder cancer:  
419 correlation between genomic aberrations and the DNA damage response.  
420 *Oncogene* **32**, 3577–3586 (2013).
- 421 38. Cingolani, P. *et al.* A program for annotating and predicting the effects of single  
422 nucleotide polymorphisms, SnpEff: SNPs in the genome of *Drosophila*  
423 *melanogaster* strain w1118; iso-2; iso-3. *Fly* **6**, 80–92 (2012).
- 424 39. Birkenkamp-Demtröder, K. *et al.* Monitoring Treatment Response and Metastatic  
425 Relapse in Advanced Bladder Cancer by Liquid Biopsy Analysis. *Eur. Urol.* **73**,  
426 535–540 (2018).

427

## 428 **Acknowledgements**

429 This work was funded by the Danish Cancer Research Foundation, the Danish Cancer  
430 Society, and the Danish Cancer Biobank (grant numbers are not applicable).

431

## 432 **Contributions**

433 M.B.H.T. and J.B.J. collected patient material. T.S. performed clinical follow up.

434 M.B.H.T. performed LMD experiments and DNA-extraction. T.S. and I.N. performed

435 experimental work. T.S., E.C., and P.L. performed bioinformatic analyses. L.D., I.N.,  
 436 P.L., and T.S. designed the study and interpreted data. T.S. drafted the manuscript  
 437 with input from all authors.

#### 438 **Competing interests**

439 No authors have competing interests in this study.

#### 440 **Corresponding author**

441 Correspondence to Lars Dyrskjøt.

442 **Table 1:**

| <b>Table 1: Analysis of mutations</b>        |  | <b>Patient 1</b>           | <b>Patient 2</b>            | <b>Patient 3</b>                             | <b>Patient 4</b>                                          |
|----------------------------------------------|--|----------------------------|-----------------------------|----------------------------------------------|-----------------------------------------------------------|
| <b>Focality</b>                              |  | <b>Multifocal</b>          | <b>Multifocal</b>           | <b>Unifocal</b>                              | <b>Unifocal</b>                                           |
| <b>T Stage (Clinical)</b>                    |  | <b>T3b</b>                 | <b>T3b</b>                  | <b>T3b</b>                                   | <b>T2b</b>                                                |
| <b>Grade</b>                                 |  | <b>High</b>                | <b>High</b>                 | <b>High</b>                                  | <b>High</b>                                               |
| <b>N Status</b>                              |  | <b>1</b>                   | <b>0</b>                    | <b>0</b>                                     | <b>0</b>                                                  |
| <b>Total number of mutations</b>             |  | <b>30</b>                  | <b>34</b>                   | <b>50</b>                                    | <b>93</b>                                                 |
| <b>No. N-Mutations</b>                       |  | <b>16 (53%)</b>            | <b>9 (26%)</b>              | <b>2 (4%)</b>                                | <b>5 (5%)</b>                                             |
| <b>No. T-Mutations</b>                       |  | <b>8 (27%)</b>             | <b>14 (41%)</b>             | <b>42 (84%)</b>                              | <b>75 (81%)</b>                                           |
| <b>No. S-Mutations</b>                       |  | <b>6 (20%)</b>             | <b>11 (32%)</b>             | <b>6 (12%)</b>                               | <b>13 (14%)</b>                                           |
| <b>Mutated bladder cancer driver genes</b>   |  |                            |                             |                                              |                                                           |
| <b>N-Mutations</b>                           |  | <i>BCOR, TBX3</i>          | -                           | -                                            | -                                                         |
| <b>T-Mutations</b>                           |  | <i>BAP1, TP53</i>          | <i>CDKN1A, CHEK2, APC</i>   | <i>BRCA1, FAT1, NOTCH1, CDH1, TBX3, NRAS</i> | <i>HSP90AA1, KDM6A, CDKN1A, TBX3, MAP3K1, FBXW7, GNAS</i> |
| <b>S-Mutations</b>                           |  | <i>FGFR3, BAP1</i>         | <i>EP300, IRS2</i>          | <i>TBX3</i>                                  | <i>EP300</i>                                              |
| <b>Premature stop codons</b>                 |  |                            |                             |                                              |                                                           |
| <b>N-Mutations</b>                           |  | <i>TRRAP, EPHB4</i>        | -                           | -                                            | -                                                         |
| <b>T-Mutations</b>                           |  | -                          | <i>CHEK2</i>                | <i>NF2, CDH1</i>                             | <i>BIRC3, HSP90AA1, KDM6A, RPTOR, EPHA5</i>               |
| <b>S-Mutations</b>                           |  | <i>BAP1</i>                | -                           | -                                            | -                                                         |
| <b>Allele frequencies (median (min-max))</b> |  |                            |                             |                                              |                                                           |
| <b>N-Mutations</b>                           |  | <b>0.042 (0.029-0.091)</b> | <b>0.067 (0.035-0.15)</b>   | <b>0.070 (0.049-0.091)</b>                   | <b>0.059 (0.049-0.091)</b>                                |
| <b>T-Mutations</b>                           |  | <b>0.23 (0.049-0.31)</b>   | <b>0.13 (0.031-0.40)</b>    | <b>0.17 (0.039-0.50)</b>                     | <b>0.16 (0.032-0.67)</b>                                  |
| <b>S-Mutations (Normal pool)</b>             |  | <b>0.022 (0.0074-0.14)</b> | <b>0.033 (0.0064-0.063)</b> | <b>0.10 (0.014-0.13)</b>                     | <b>0.025 (0.0065-0.13)</b>                                |
| <b>S-Mutations (Tumor pool)</b>              |  | <b>0.20 (0.067-0.44)</b>   | <b>0.077 (0.016-0.56)</b>   | <b>0.13 (0.057-0.19)</b>                     | <b>0.15 (0.020-0.61)</b>                                  |

443 **Figure legends**

444 **Figure 1: Analysis of field cancerization in four patients.** (a) Study design. Upper  
445 part: analyses performed previously. WES was performed on bulk tumor samples.  
446 Multiple tumor and normal biopsies were laser microdissected (LMD) and subjected  
447 to deep targeted amplicon sequencing guided by the bulk tumor WES. Lower part:  
448 present study (black box). Tumor and normal DNA samples were pooled and  
449 subjected to deep targeted amplicon sequencing. Mutation calls were analyzed and  
450 grouped into T-Mutations, N-Mutations, and S-Mutations. (b) Analysis of patients 1-4.  
451 Field cancerization visualized using T-Mutations, N-Mutations, and S-Mutations. Gene  
452 names and allele frequencies (AF) are displayed. AFs are illustrated as light grey bars  
453 (AF measured in tumor) and dark grey (AF measured in normal).

454  
455 **Figure 2: Validation of mutations.** (a) All mutations were evaluated in previously  
456 generated WES data from tumors, recurrences, and metastases from the four patients  
457 (patients 1 and 2 shown, patients 3 and 4 in Supplementary Fig. S3). Obtained AFs  
458 are marked (yellow to red ranging from >0 to 0.6). For WES data, a minimum of five  
459 reads at a given position were required for validation (indicated in grey). Dark blue  
460 indicates no alternate alleles on the position. LN = lymph node. Targ. seq. = Targeted  
461 sequencing. (b) AFs obtained by cancer panel sequencing of tumor compared to mean  
462 AFs from WES on tumor samples from all four patients. Recurrences and metastases  
463 were excluded from calculation of the mean as these samples were not included in the  
464 tumor pools. Spearman correlation was calculated. (c) Validation of previously  
465 identified tumor mutations<sup>2</sup> by ddPCR on DNA from normal samples. Multiple assays  
466 for specific mutations were included for the four patients and the fraction of mutated  
467 sequences identified using ddPCR is shown (%). \* indicates that the value is out of  
468 scale (max value = 14.8%). (d) Validation of absence of N-Mutations in DNA from  
469 tumor samples by ddPCR analysis. A positive control (synthesized oligo) for each  
470 assay was included as well as negative controls (H<sub>2</sub>O and HT1197 bladder cancer cell  
471 line). The purple line indicates cutoff set for positive droplets. Droplets positive for  
472 mutation are marked in blue and negative droplets are indicated by grey.

473  
474 **Figure 3: Analysis of mutational context, impact and frequency.** All analyses  
475 were performed on the combined set of mutations from all patients. The total number

476 of mutations in each category is indicated. **(a)** The six single-base substitutions  
477 counted among N-, T-, and S-Mutations. **(b)** Predicted impact of mutations among N-  
478 , T-, and S-Mutations grouped into high, moderate, low/modifier impact. **(c)** Predicted  
479 impact of mutations in N-, T-, and S-Mutations grouped into synonymous and non-  
480 synonymous (mutations predicted to have a high or moderate impact) mutations **(d)**  
481 Number of C>G and C>T mutations among N-, T-, and S-Mutations in APOBEC  
482 context. **(e)** Allele frequencies from N-, T-, and S-Mutations. For S-Mutations, allele  
483 frequencies are measured both in the normal samples and in the tumor samples and  
484 both are indicated.



Figure 1

a

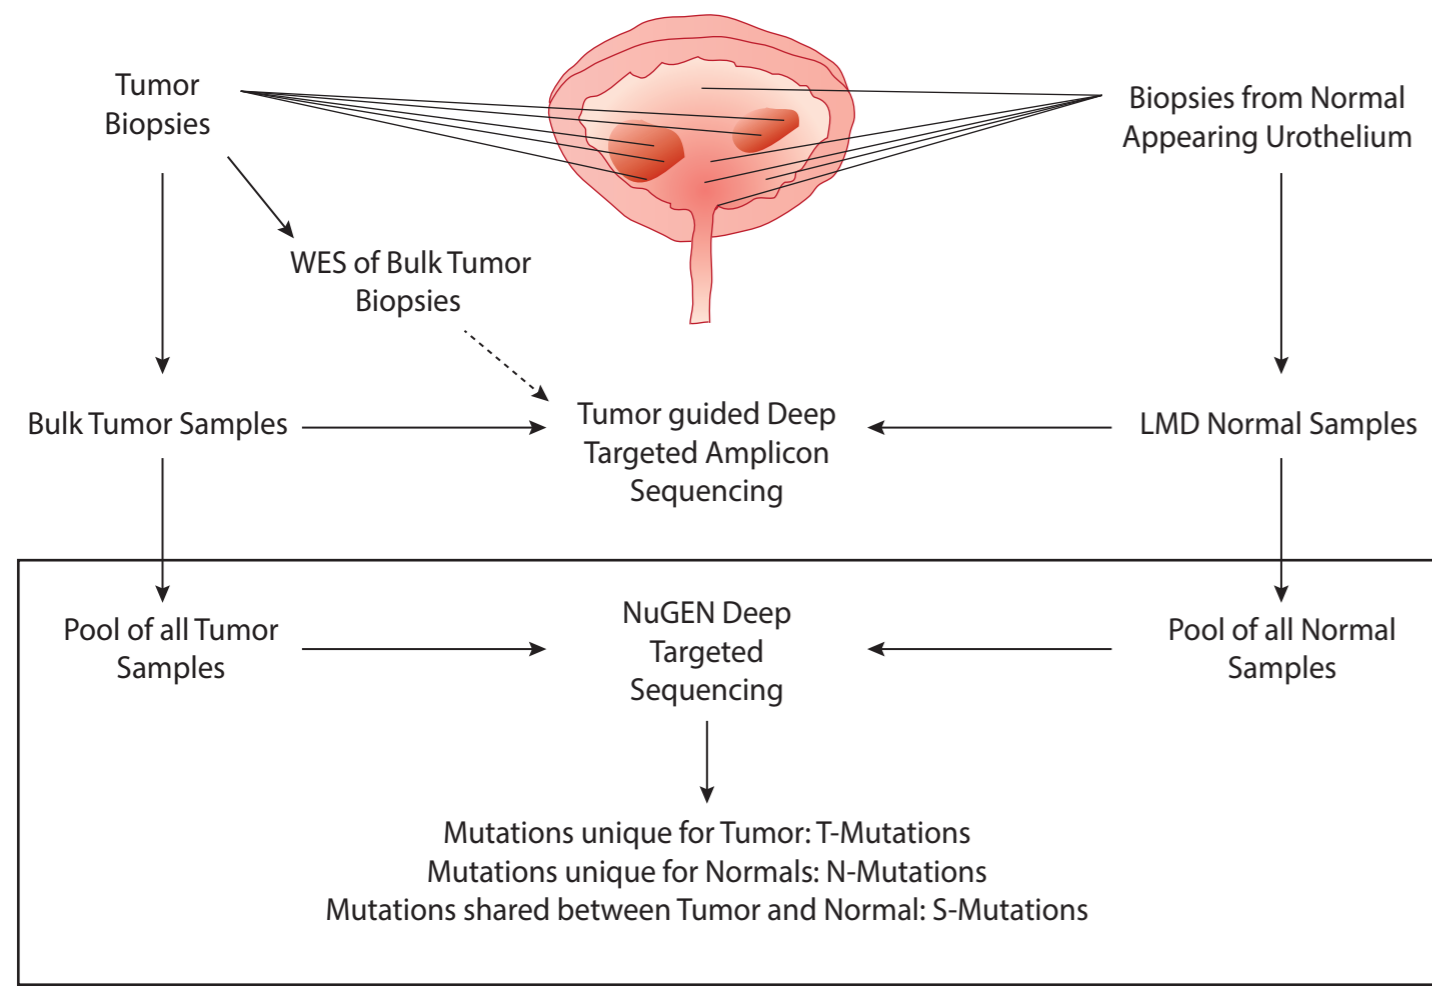

b

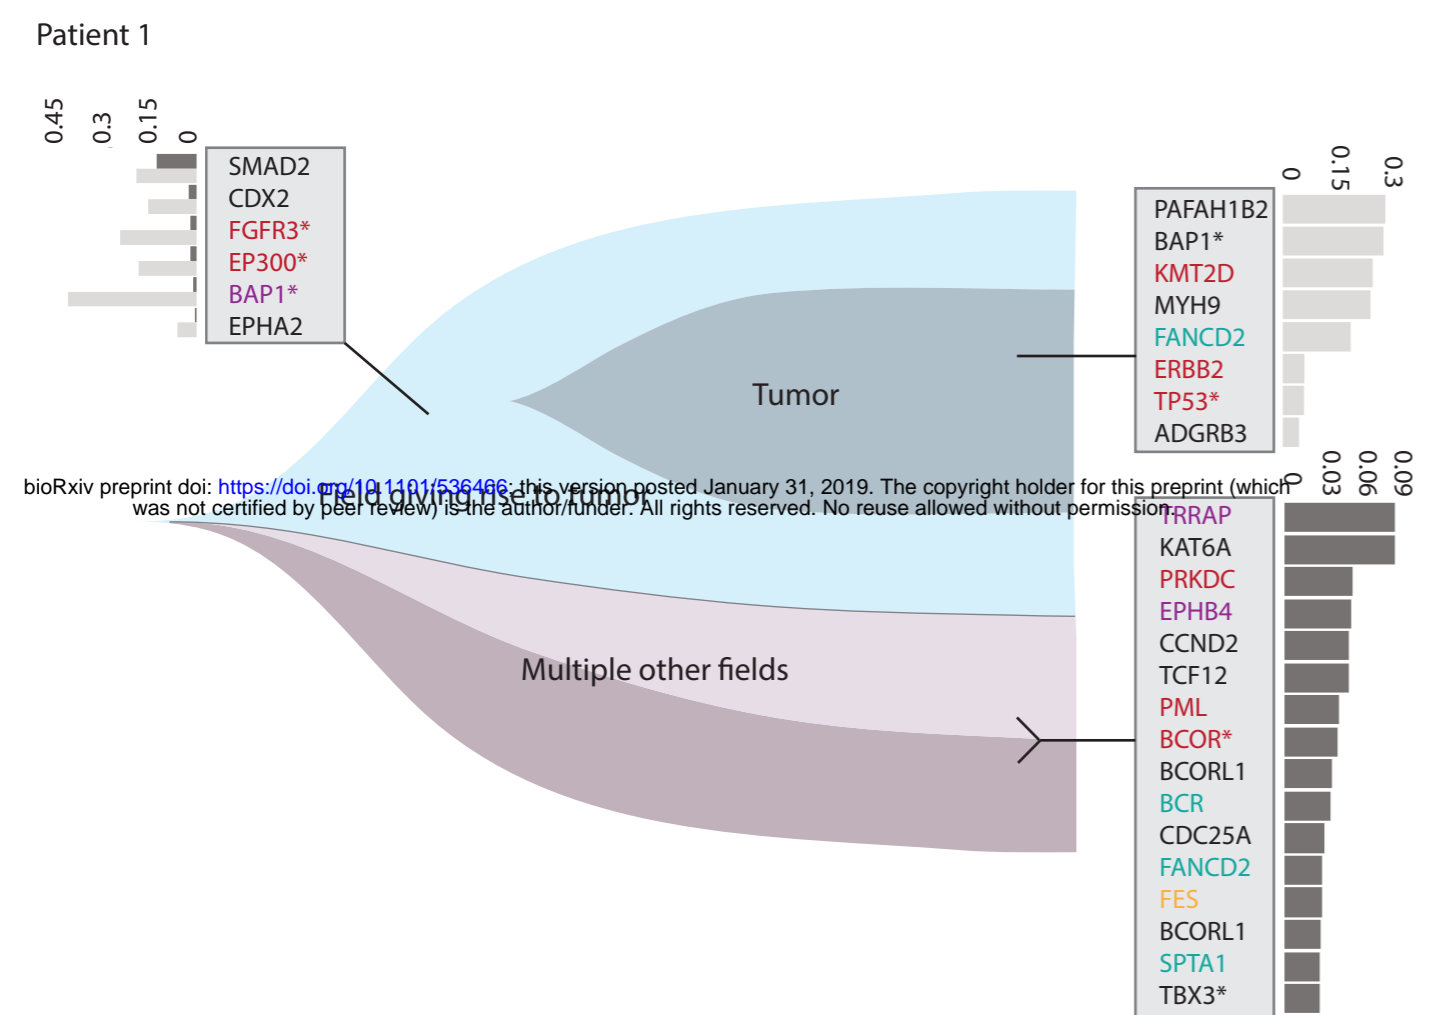

16 (53%) Mutations only found in normals (Field Effect Specific Mutations)  
6 (20%) Mutations shared between Normals and Tumor  
8 (27%) Mutations only found in Tumor (Tumor Specific Mutations)

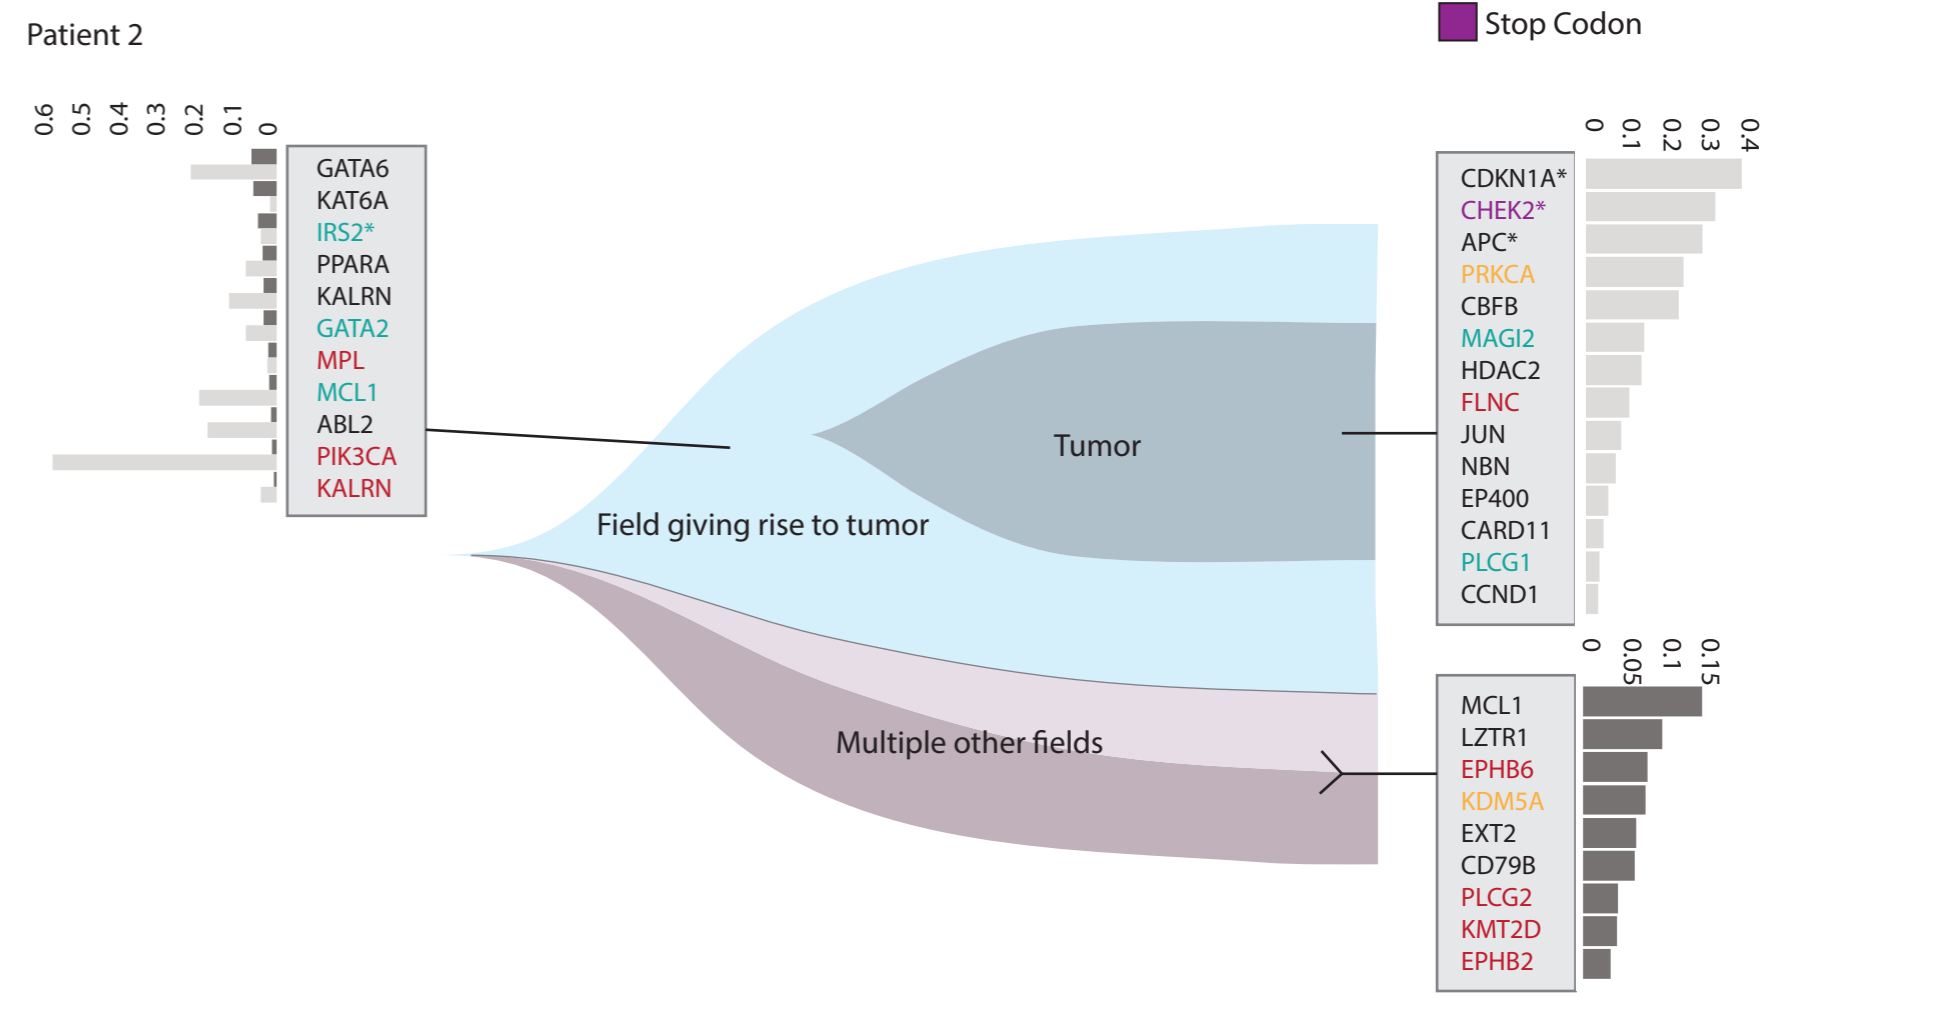

9 (26%) Mutations only found in normals (Field Effect Specific Mutations)  
11 (32%) Mutations shared between Normals and Tumor  
14 (41%) Mutations only found in Tumor (Tumor Specific Mutations)

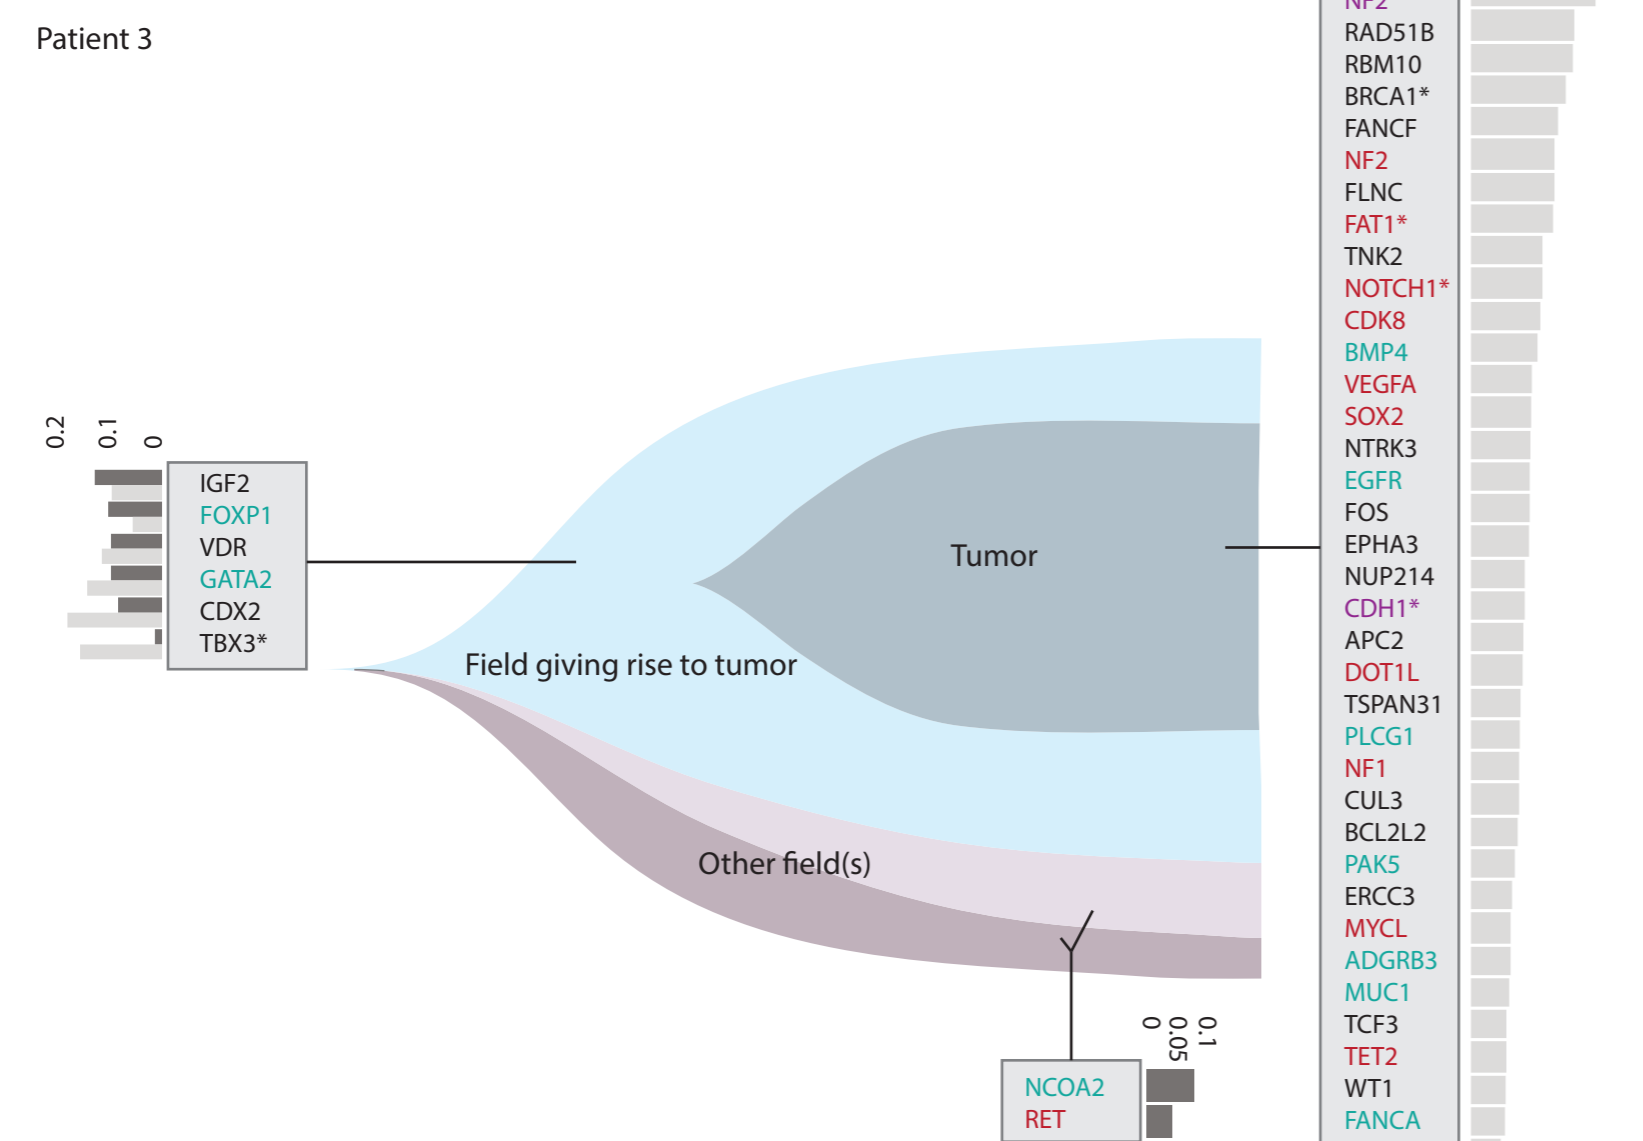

2 (4%) Mutations only found in normals (Field Effect Specific Mutations)  
6 (12%) Mutations shared between Normals and Tumor  
42 (84%) Mutations only found in Tumor (Tumor Specific Mutations)

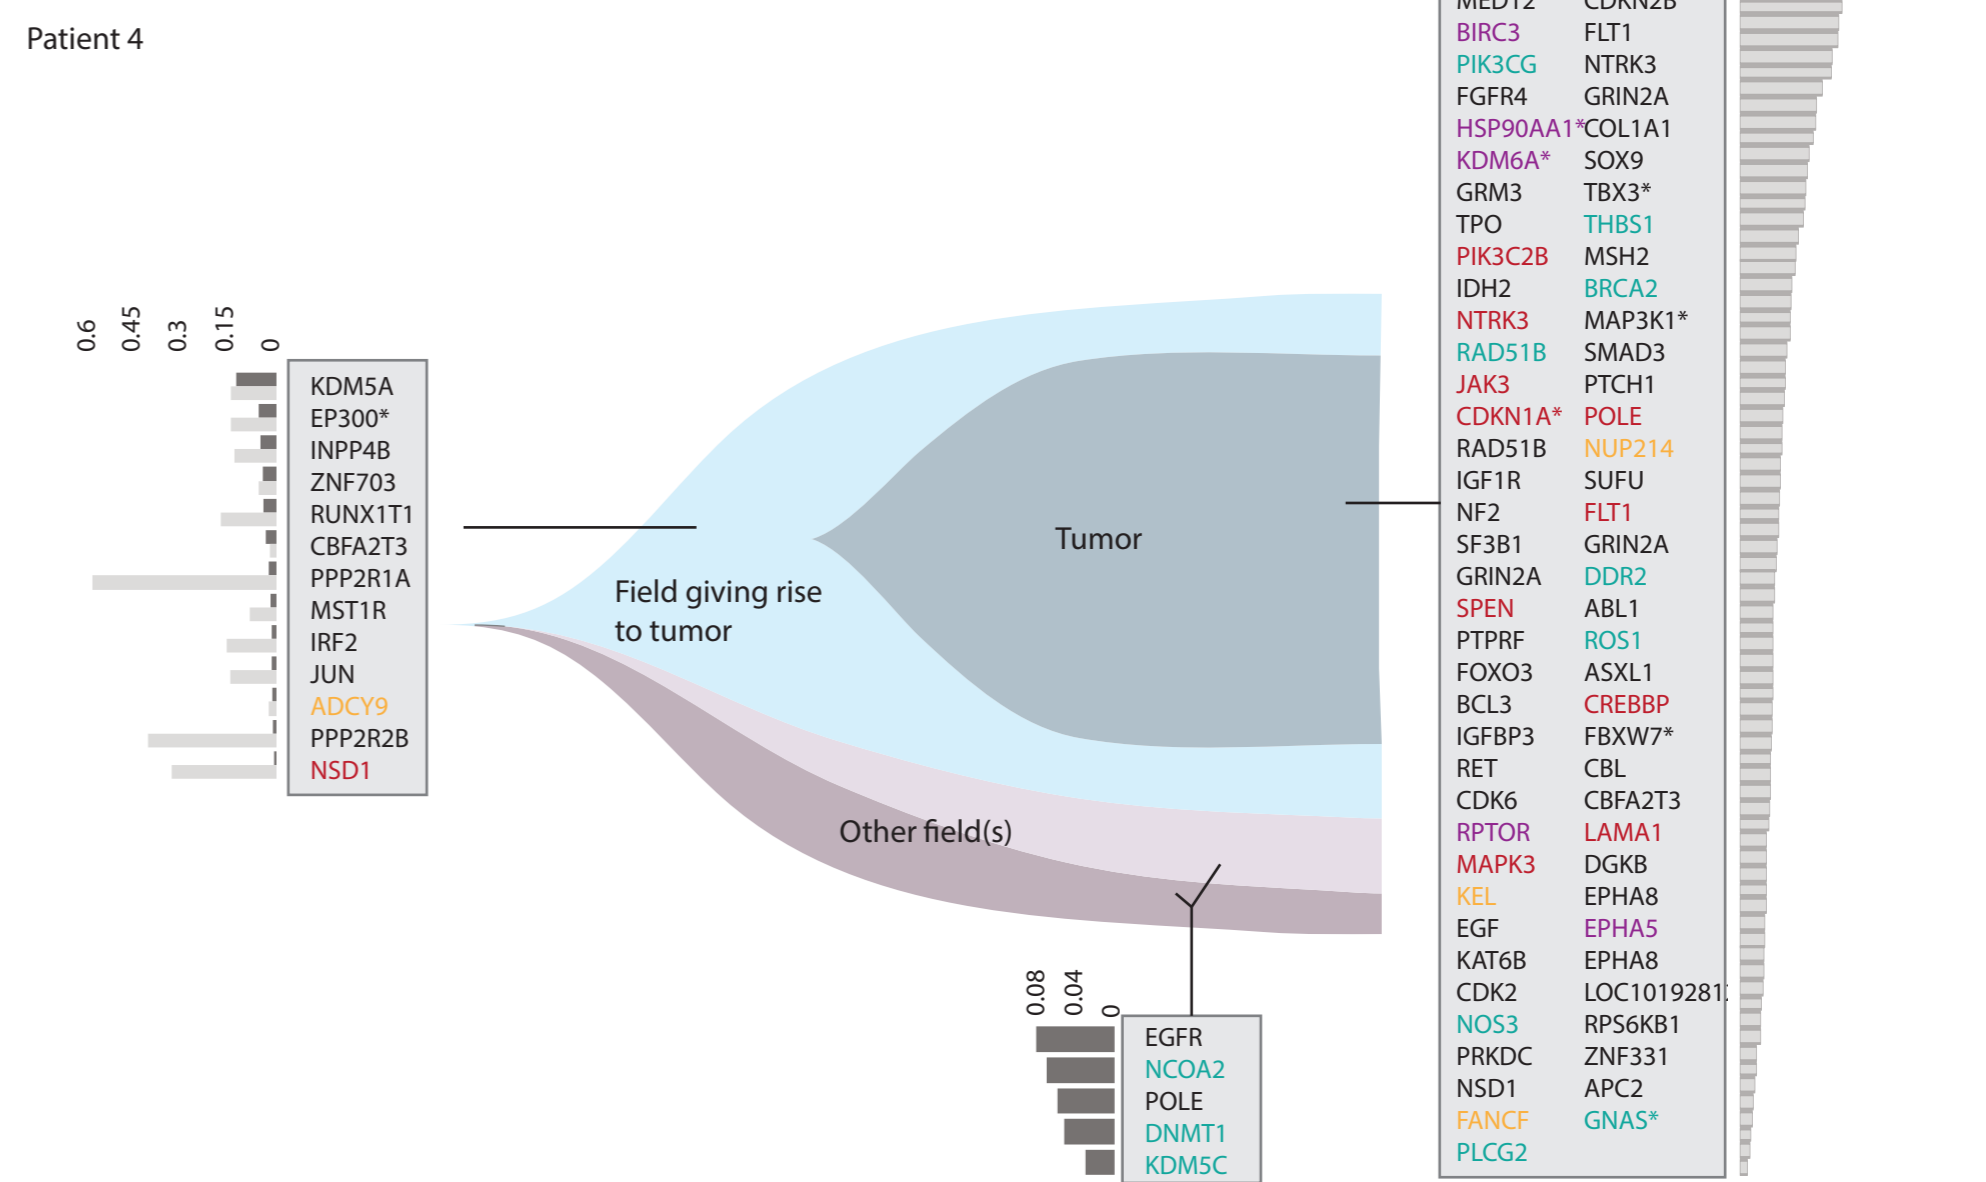

5 (5%) Mutations only found in normals (Field Effect Specific Mutations)  
13 (14%) Mutations shared between Normals and Tumor  
75 (81%) Mutations only found in Tumor (Tumor Specific Mutations)

■ PolyPhen Probably damaging  
■ PolyPhen Possibly damaging  
■ PolyPhen Benign  
\* IntOGen Bladder Cancer Driver  
■ Stop Codon

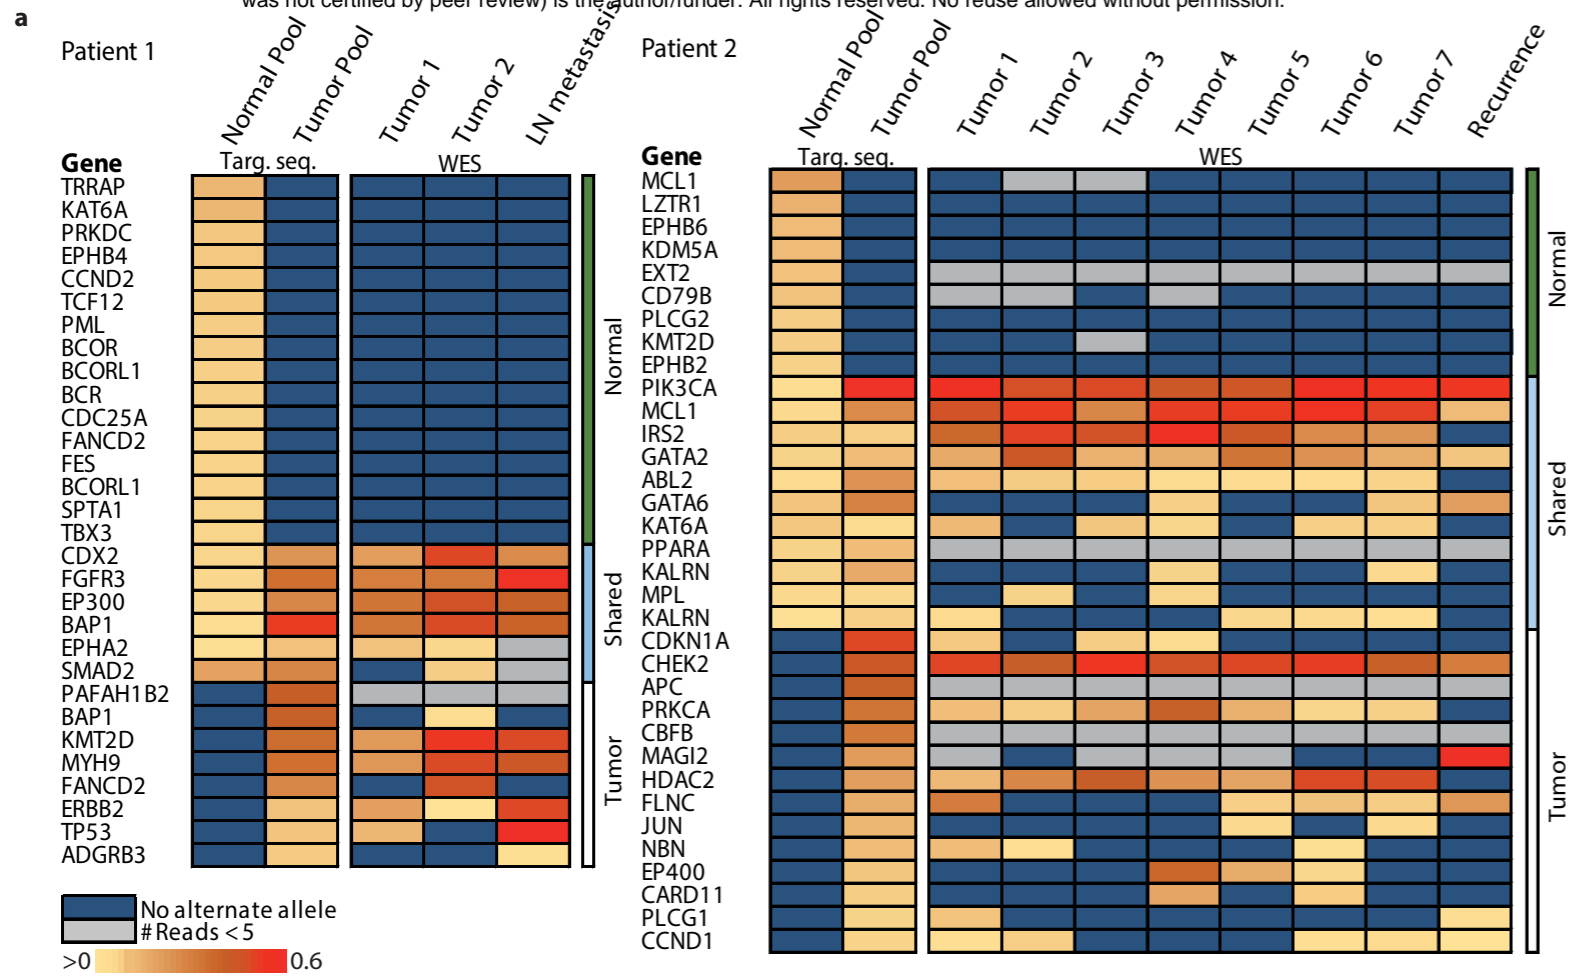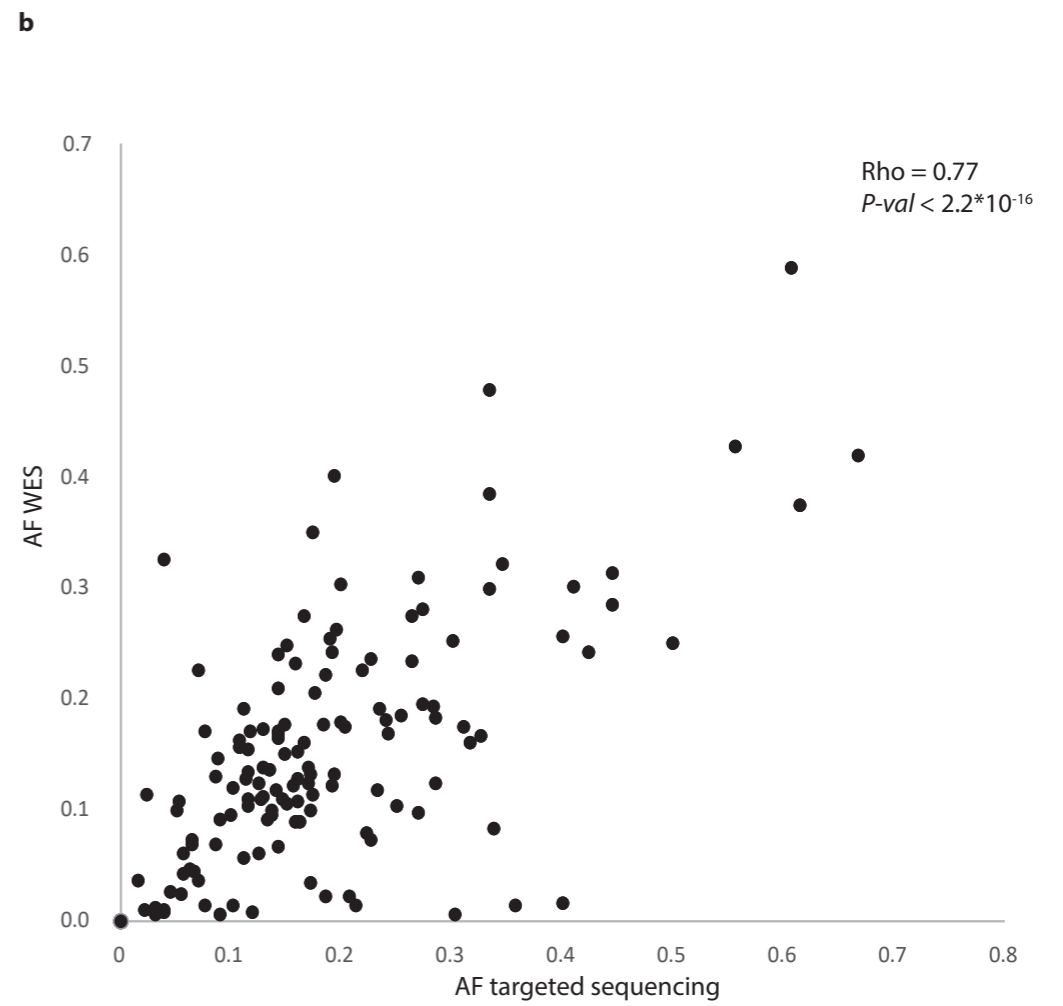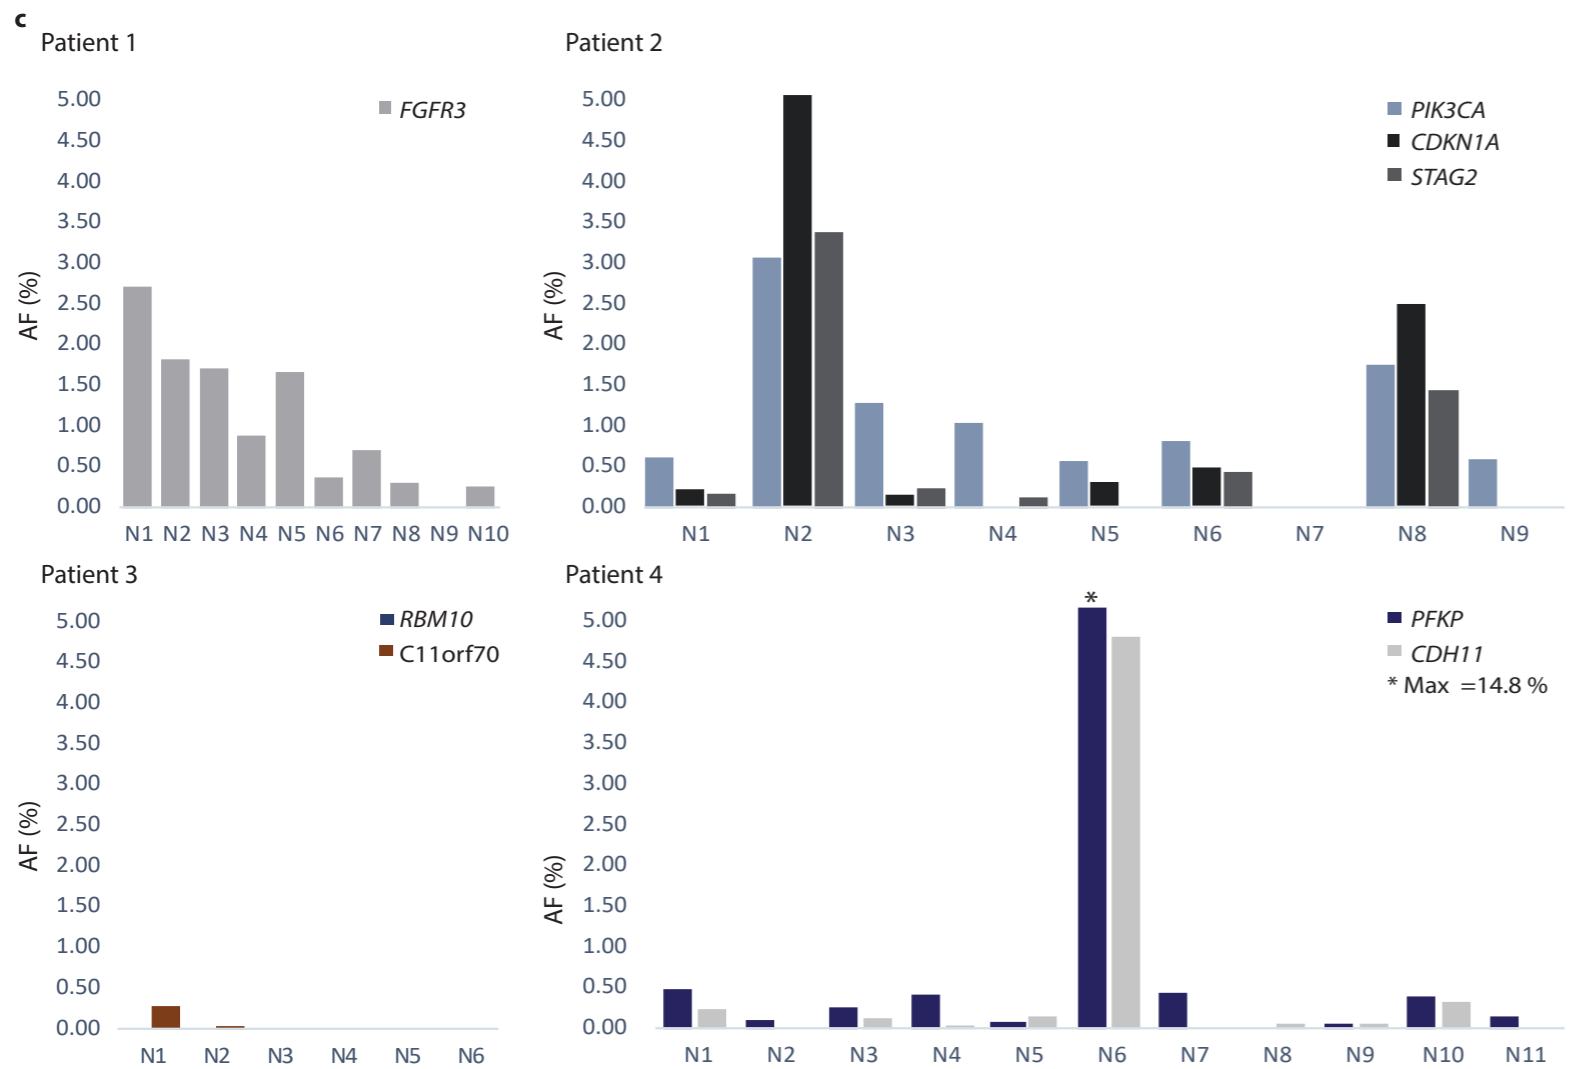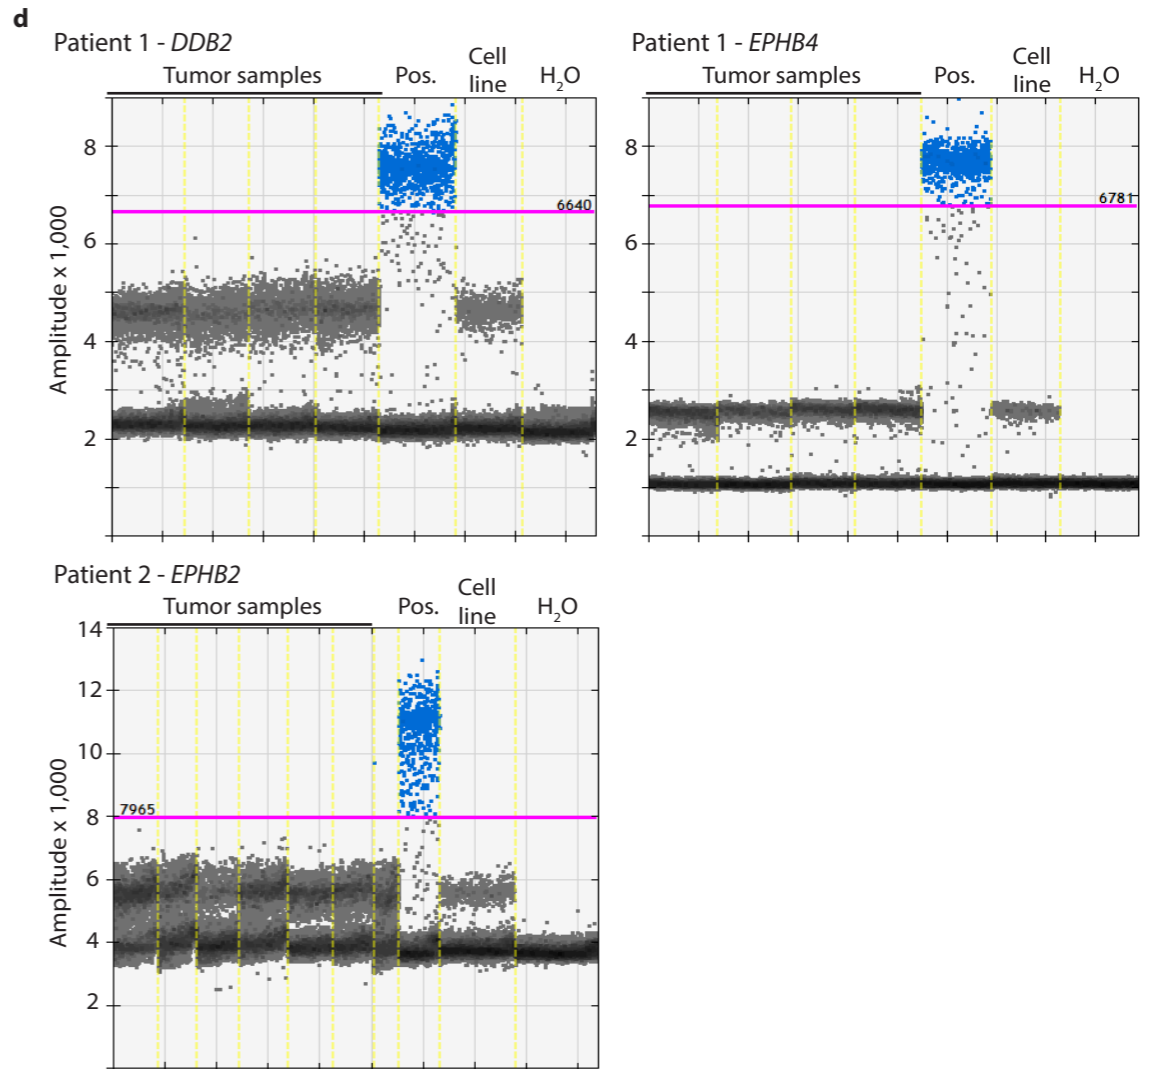

Figure 3

a

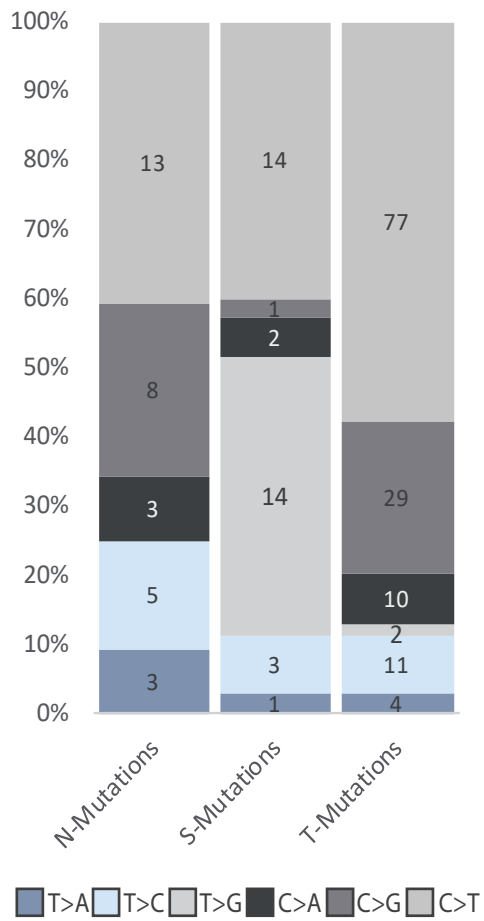

b

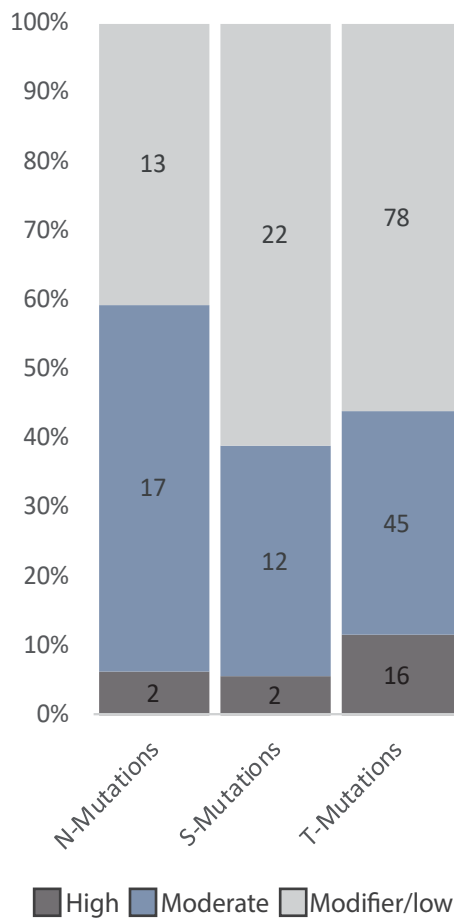

c

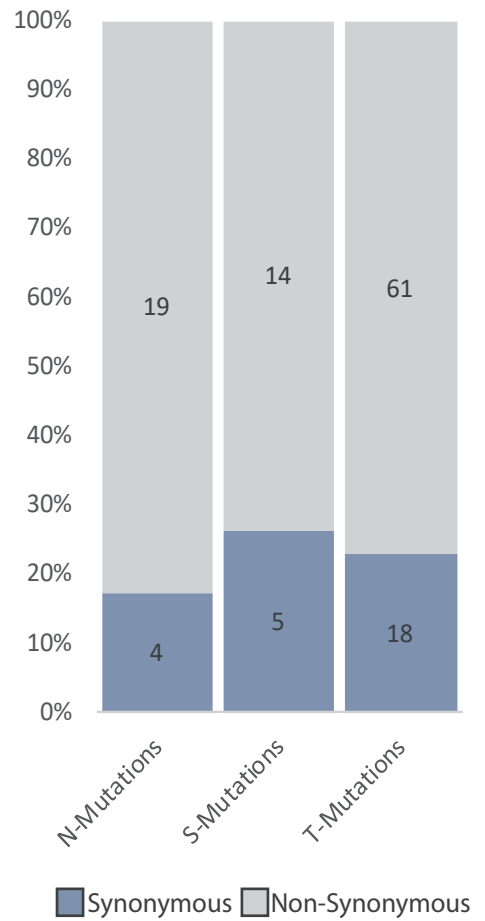

d

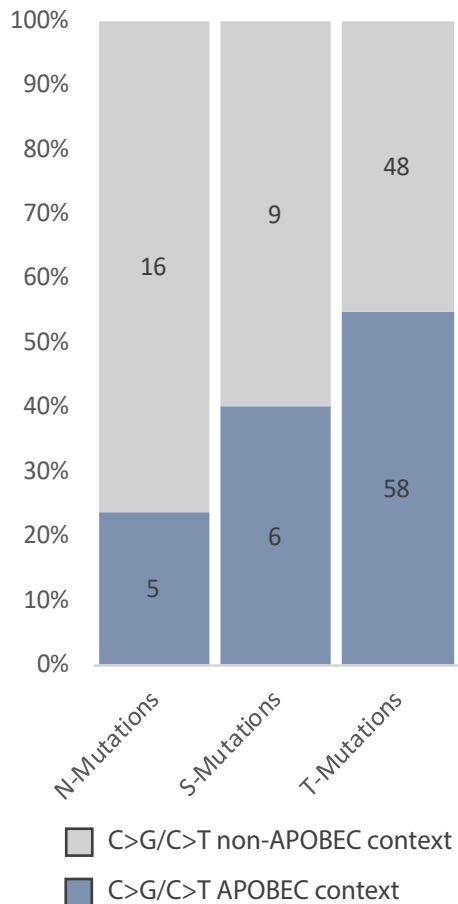

e

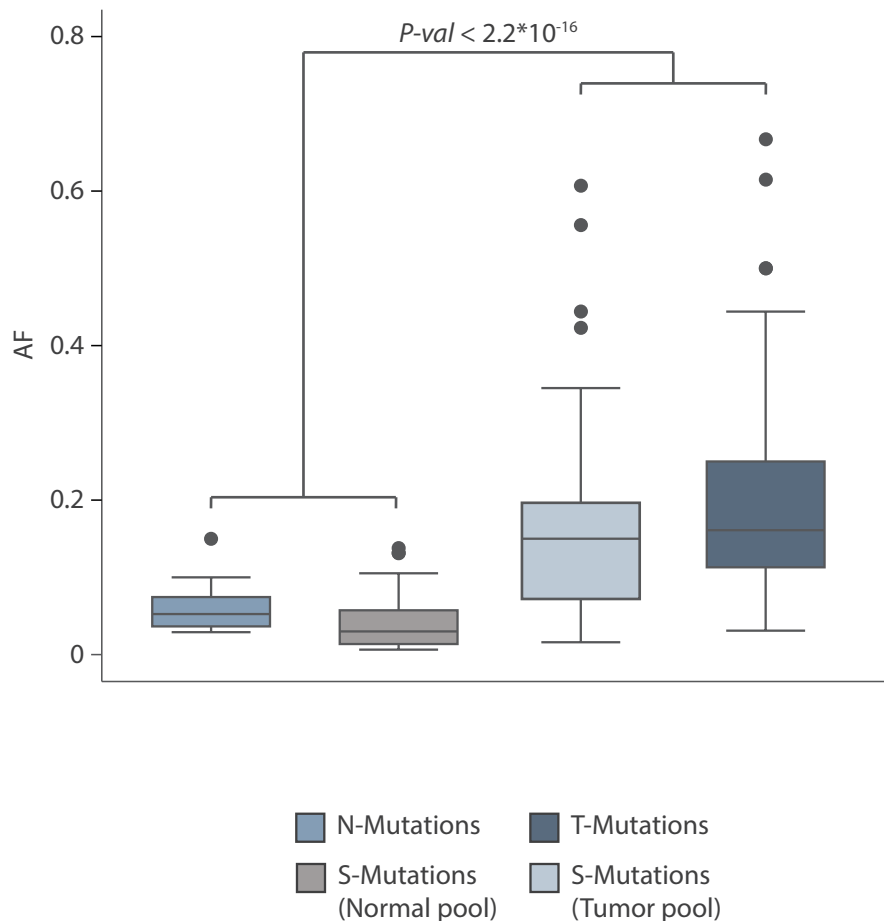

Source: https://www.biorxiv.org/content/10.1101/536466v1.full.pdf
